# Supplementary material for: Exploring Adiponectin in Autosomal Dominant Kidney Disease: Insight and Implications
Source: MDPI journal article supplement (doi:10.3390/genes15040484), 2024-04-11
Supplement: s1 [file s1]

| Gene | cDNA change                  | Region     | Protein variant        | ACMG Classification |
|------|------------------------------|------------|------------------------|---------------------|
| PKD1 | c.359+2T>G                   | Int3       |                        | P                   |
|      | c.427C>T                     | Ex4        | p.Gln143Ter            | LP                  |
|      | c.680_681insT (?)            | Ex5        | p.Gln227Hisfs*34       | LP                  |
|      | c.1105_1106delAG             | Ex5        | p.Ser369Ter            | P                   |
|      | C.1141G>A                    | Ex5        | p.Gly381Ser            | P                   |
|      | c.1273_1275delGAG            | Ex6        | p.Glu425del            | LP                  |
|      | c.10722G>A                   | Ex7        | p.Trp3574Ter           | P                   |
|      | c.1832G>C                    | Ex9        | p.Arg611Pro            | Vus                 |
|      | c.2085delC                   | Ex10       | p.Ala696ArgfsTer89     | P                   |
|      | c.2180T>C                    | Ex11       | p.Leu727Pro            | LP                  |
|      | c.2189C>T                    | Ex11       | p.Ser730Leu            | VUS                 |
|      | c.2215dupC                   | Ex11       | p.Gln739ProfsTer59     | LP                  |
|      | c.2534T>C                    | Ex11       | p.Leu845Ser            | P                   |
|      | c.2711_2712delAG             | Ex11       | p.Glu904GlyfsTer196    | LP                  |
|      | c.2985+3A>C                  | Int12      |                        | VUS                 |
|      | c.3067C>T                    | Ex13       | p.Gln1023Ter           | P                   |
|      | c.3295+2T>C                  | Int14      | -                      | P                   |
|      | c.6916-9G>A                  | Int15      | -                      | LP                  |
|      | c.3349C>T                    | Ex15       | p.Gln1117Ter           | P                   |
|      | c.3398_3399delTG             | Ex15       | p.Val1133GlufsTer2     | LP                  |
|      | c.3514C>T                    | Ex15       | p.Gln1172Ter           | P                   |
|      | c.3520_3527delCAGCCGG<br>C   | Ex15       | p.Gln1174Cysfs34Ter    | LP                  |
|      | c.3706C>T                    | Ex15       | p.Gln1236Ter           | P                   |
|      | c.3745delG                   | Ex15       | p.Asp1249ThrfsTer24    | P                   |
|      | c.3802C>T                    | Ex15       | p.Gln1268Ter           | LP                  |
|      | c.3955G>A                    | Ex15       | p.Gly1319Arg           | P                   |
|      | c.4888C>T                    | Ex15       | p.Gln1630*             | P                   |
|      | c.4951C>T                    | Ex15       | p.Gln1651Ter           | P                   |
|      | c.5154_5163dupGGGGTG<br>GCTG | Ex15       | p.TerMet1722GlyfsTer52 | P                   |
|      | c.5223dupG                   | Ex15       | p.Leu1742AlafsTer29    | LP                  |
|      | c.5609A>G                    | Ex15       | p.Asn1870Ser           | LP                  |
|      | c.5869_5870dupAG             | Ex15       | p.Ser1957ArgfsTer16    | LP                  |
|      | c.5884C>T                    | Ex15       | p.Gln1962Ter           | P                   |
|      | c.5905G>T                    | Ex15       | p.Glu1969Ter           | P                   |
|      | c.5911G>A                    | Ex15       | p.Val1971Met           | VUS                 |
|      | c.6199C>T                    | Ex15       | p.Gln2067Ter           | P                   |
|      | c.7416_7417insC              | EX18       | p.Gly2473ArgfsTer28    | LP                  |
|      | c.7597_7598delTC             | Ex19       | p.Ser2533Glnfs*61      | P                   |
|      | c.7864_7899del               | Int20-Ex21 | p.Tyr2622_Lys2633del   | p                   |
|      | c.7984C>T                    | Ex21       | p.Gln2662Ter           | LP                  |
|      | c.8238delG                   | Ex23       | p.Met2747TrpfsTer9     | LP                  |
|      | c.8279T>G                    | Ex23       | p.Met2760Arg           | LP                  |
|      | c.8311G>A                    | Ex23       | p.Glu27771 Lys         | P                   |

|      |                                     |       |                      |        |
|------|-------------------------------------|-------|----------------------|--------|
|      | c.8371_8372dupCG                    | Ex23  | p.Ser2792GlyfsTer84  | P      |
|      | c.8698C>T                           | Ex23  | p.Gln2900Ter         | P      |
|      | c.8935_8937delTTC                   | Ex24  | p.Phe2979del         | P      |
|      | c.9404C>T                           | ex27  | p.Thr3135Met         | VUS    |
|      | c.9425_9426insA                     | Ex27  | p.Tyr3143ValfsTer36  | P      |
|      | c.9562A>G                           | Ex27  | p.Asn3188Asp         | VUS/LP |
|      | c.9564_9566delCAA                   | Ex27  | p.Asn3188del         | LP     |
|      | c.9676A>G                           | Ex28  | p.Asn3226Asp         | V      |
|      | c.9771_9774delCTTT                  | Ex29  | p.Phe3257LeufsTer58  | P      |
|      | c.10026delT                         | Ex30  | p.Leu3343SerfsTer54  | P      |
|      | c.10217+2T>G                        | Int32 | -                    | P      |
|      | c.10420C>T                          | Ex34  | p.Gln3474Ter         | P      |
|      | c.10459C>T                          | Ex34  | p.Gln3487Ter         | P      |
|      | c.10549G>T                          | Ex35  | p.Glu3517Ter         | LP     |
|      | c.10591C>T                          | Ex35  | p.Gln3531Ter         | P      |
|      | C.10722G>A                          | EX36  | p.Trp3574Ter         | P      |
|      | c.10768T>C                          | Ex36  | p.Ser3590Pro         | V      |
|      | c.10807G>C                          | Ex36  | p.Glu3603Gln         | LP     |
|      | c.10894_10895del                    | Ex37  | p.Ser3632ProfsTer88  | P      |
|      | c.10973_10987delAAGAA<br>GCCCGCAAGG | Ex37  | p.Glu3658_Lys3662del | LP     |
|      | c.11267-1G>T                        | Int39 | -                    | p      |
|      | c.11438_11439delAT                  | Ex41  | p.Tyr3813Ter         | LP     |
|      | c.11534G>T                          | Ex41  | p.Arg3845Met         | P      |
|      | c.11571C>G                          | Ex42  | p.Tyr3857Ter         | P      |
|      | c.11585T>G                          | Ex42  | p.Leu3862Arg         | VUS    |
|      | c.11639_11683del                    | Ex42  | p.Ala3880_Ala3894del | VUS    |
|      | c.11646_11659del                    | Ex42  | p.Ser3883CysfsTer72  | P      |
|      | c.11705_11708delCCTC                | Ex42  | p.Thr3902ArgfsTer41  | LP     |
|      | c.11967_11974dup                    | Ex43  | p.Ser3992TrpfsTer49  | P      |
|      | c.11881C>T                          | Ex43  | p.Gln3961Ter         | P      |
|      | c.12008dupA                         | Ex 44 | p.Gln4005AlafsTer152 | P      |
|      | c.12058C>T                          | Ex44  | p.Arg4021Ter         | P      |
|      | c.12908A>T                          | Ex46  | p.4303LeuextTer35    | VUS    |
|      | c.8267C>T                           | Ex23  | p.Thr2756Ile         | VUS    |
|      | c.11870G>A                          | Ex43  | p.Gly3957Asp         | VUS    |
| PKD2 | c.595+3A>T                          | Int1  | -                    | P      |
|      | c.261G>A                            | Ex1   | p.Trp87Ter           | P      |
|      | c.709+1G>A                          | Int2  | -                    | P      |
|      | c.608C>T                            | Ex2   | p.Thr203Ile          | VUS    |
|      | c.637C>T                            | Ex2   | p.Arg213Ter          | p      |
|      | c.1094+3_1094+6delAAGT              | Int4  | -                    | P      |
|      | c.916C>T                            | Ex4   | p.Arg306Ter          | p      |
|      | c.958C>T                            | Ex4   | p.Arg320Ter          | P      |
|      | c.964C>T                            | Ex4   | p.Arg322Trp          | P      |
|      | c.1142G>T                           | Ex5   | p.Gly381Val          | LP     |

|             |        |                    |     |
|-------------|--------|--------------------|-----|
| c.1244T>G   | Ex5    | p.Leu415Arg        | LP  |
| c.1395T>A   | Ex6    | p.Tyr465Ter        | LP  |
| c.1837C>T   | Ex8    | p.Gln613Ter        | P   |
| c.2117delA  | Ex10   | p.Lys706ArgfsTer10 | LP  |
| c.2358delG  | Ex12   | p.Glu787ArgfsTer14 | P   |
| c.2419C>T   | ex13   | p.Arg807Ter        | P   |
| c.2670+5G>A | Int 14 | -                  | VUS |
| c.2614C>T   | Ex14   | p.Arg872Ter        | P   |

Supplementary Table S1: Genetic characterization of ADPKD patients analyzed in the study. PKD1 and PKD2 gene mutations were shown.

| Gene                            | SNPs         | cDNA                     | Protein                  | Location                                                                | Coding impact        | Publications                                                                                           |
|---------------------------------|--------------|--------------------------|--------------------------|-------------------------------------------------------------------------|----------------------|--------------------------------------------------------------------------------------------------------|
| PPAR $\gamma$<br>NM_001354668.2 | rs1801282    | c.34 C>G                 | P12A<br>p.(Pro1<br>2Ala) | exon 1 of 7<br>position<br>210 of 258<br>(coding)                       | Missense             | DOI: 10.1515/CCLM.2009.242.<br>DOI: 10.1038/ng.3943.                                                   |
| ADIPOQ<br>NM_001177800.1        | rs2241766    | c.45T>G                  | G15=<br>p.(Gly1<br>5=)   | exon 3 of 4<br>position 53<br>of 222<br>(coding)                        | synonymous           | DOI:10.1016/j.jdiacomp.2012.0<br>2.008<br>DOI:<br>10.1371/journal.pone.0058412.                        |
|                                 | rs1501299    | c.214+62G>T              | -                        | intron 3 of<br>3 position<br>62 of 911<br>(intronic)                    | -                    | DOI: 10.1186/1471-2350-13-40.<br>DOI:<br>10.1016/j.mce.2011.10.001.                                    |
|                                 | rs62625753   | c.268G>A                 | G90S<br>p.(Gly9<br>0Ser) | exon 4 of 4<br>position 54<br>of 4280<br>(coding)                       | missense             | DOI: 10.3390/nul1092195.<br>DOI:<br>10.1016/j.cca.2008.02.011.                                         |
|                                 | rs1295862787 | c.696C>T                 | S232=<br>p.(Ser2<br>32=) | exon 4 of 4<br>position<br>482 of<br>4280<br>(coding)                   | synonymous           | -                                                                                                      |
| ADIPOR1<br>NM_001290557.1       | rs2275737    | c. 94-8T>G               | -                        | intron 1 of<br>7 position<br>7013 of<br>7020<br>(splicing,<br>intronic) | -                    | DOI:<br>10.1900/RDS.2017.14.311.<br>PMID: 26629210                                                     |
|                                 | rs2275738    | c. 94-12A>G              | -                        | intron 1 of<br>7 position<br>7009 of<br>7020<br>(intronic)              | -                    | DOI: 10.1016/j.mgene.2016.07.<br>008                                                                   |
| ADIPOR2<br>NM_024551.2          | rs16928751   | c.795G>A                 | synony<br>mous           | exon 6 of 8<br>position<br>145 of 188<br>(coding)                       | Q265=<br>p.(Gln265=) | DOI: 10.1900/RDS.2008.5.28<br>DOI: 10.1186/1475-2840-10-83                                             |
|                                 | rs1044471    | c.*1718C>T<br>o g.33447T | -                        | exon 8 of 8<br>(3'UTR)<br>position<br>1847 of<br>2731                   | -                    | DOI: 10.1016/j.gene.2018.03.02<br>2<br>DOI: 10.1007/s12032-013-<br>0658-9<br>DOI: 10.1038/oby.2008.344 |
|                                 | rs12342      | c.*1642C>T               | -                        | exon 8 of 8<br>(3'UTR)<br>position<br>1771 of<br>2731                   | -                    | DOI: 10.1016/j.ygeno.2019.12.0<br>20<br>DOI: 10.4238/2014.September.<br>26.19                          |
|                                 | rs767870     | c.650+20G>A              | -                        | intron 5 of<br>7 position<br>20 of 251<br>(intronic)                    | -                    | DOI: 10.2337/diabetes.55.03.06<br>.db05-0665<br>DOI: 10.1530/EJE-08-0900                               |

Supplementary Table S2: SNPs in PPAR $\gamma$ , ADIPOQ, ADIPOR1, ADIPOR2 genes.
